# Supplementary material for: Cohort profile: LifeLines DEEP, a prospective, general population cohort study in the northern Netherlands: study design and baseline characteristics
Source: HighWire-hosted journal article supplement (doi:10.1136/bmjopen-2014-006772), 2015-08-01
Supplement: bmjopen-2014-006772supp_figure.pdf [file bmjopen-2014-006772supp_figure.pdf]

## Supplement 1

---

Title: Cohort profile: LifeLines DEEP, a prospective, general population cohort study in the northern Netherlands – study design and baseline characteristics

Journal: BMJ Open

Authors: Ettje F. Tigchelaar, Alexandra Zhernakova, Jackie A.M. Dekens, Gerben Hermes, Agnieszka Baranska, Zlatan Mujagic, Morris A. Swertz, Angélica M. Muñoz, Patrick Deelen, Maria C. Cénit, Lude Franke, Salome Scholtens, Ronald P. Stolk, Cisca Wijmenga, Edith J.M. Feskens

---

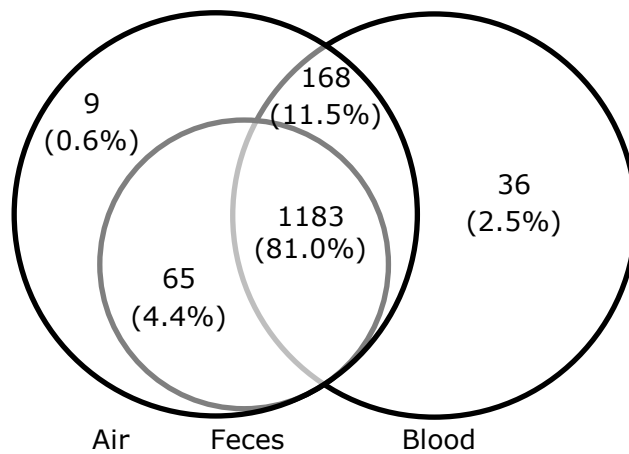

Fig S1 Overview of additional biomaterials collected in LifeLines DEEP
