# Supplementary material for: Cohort profile: LifeLines DEEP, a prospective, general population cohort study in the northern Netherlands: study design and baseline characteristics
Source: HighWire-hosted journal article supplement (doi:10.1136/bmjopen-2014-006772), 2015-08-01
Supplement: bmjopen-2014-006772supp_tableS1.pdf [file bmjopen-2014-006772supp_tableS1.pdf]

## Supplement 2

---

Title: Cohort profile: LifeLines DEEP, a prospective, general population cohort study in the northern Netherlands – study design and baseline characteristics

Journal: BMJ Open

Authors: Ettje F. Tigchelaar, Alexandra Zhernakova, Jackie A.M. Dekens, Gerben Hermes, Agnieszka Baranska, Zlatan Mujagic, Morris A. Swertz, Angélica M. Muñoz, Patrick Deelen, Maria C. Cénit, Lude Franke, Salome Scholtens, Ronald P. Stolk, Cisca Wijmenga, Edith J.M. Feskens

---

Table S1. Overview of collected data in LifeLines and source it originates from. More detailed information has been described by Scholtens et al. (2014) and is available through the LifeLines data catalog [[www.lifelines.net](http://www.lifelines.net)]

| LifeLines              |                                         |
|------------------------|-----------------------------------------|
| Data                   | Source                                  |
| 24h urine biochemistry | Assessed by trained technician          |
| Blood basic chemistry  | Assessed by trained technician          |
| Anthropometry          | Examined by trained physician assistant |
| Blood pressure         | Examined by trained physician assistant |
| Cognitive functioning  | Examined by trained physician assistant |
| Electrocardiogram      | Examined by trained physician assistant |
| Pulmonary function     | Examined by trained physician assistant |
| Demographics           | Questionnaire                           |
| Education              | Questionnaire                           |
| Food intake            | Questionnaire                           |
| Health status          | Questionnaire                           |
| Medication use         | Questionnaire                           |
| Physical activity      | Questionnaire                           |
| Quality of life        | Questionnaire                           |
| Smoking                | Questionnaire                           |

Scholtens S, Smidt N, Swertz MA, et al. Cohort Profile: LifeLines, a three-generation cohort study and biobank. *Int J Epidemiol* 2014;:dyu229 – . doi:10.1093/ije/dyu229
