# Supplementary material for: Cohort profile: LifeLines DEEP, a prospective, general population cohort study in the northern Netherlands: study design and baseline characteristics
Source: HighWire-hosted journal article supplement (doi:10.1136/bmjopen-2014-006772), 2015-08-01
Supplement: bmjopen-2014-006772supp_tableS2.pdf [file bmjopen-2014-006772supp_tableS2.pdf]

### Supplement 3

---

Title: Cohort profile: LifeLines DEEP, a prospective, general population cohort study in the northern Netherlands – study design and baseline characteristics

Journal: BMJ Open

Authors: Ettje F. Tigchelaar, Alexandra Zhernakova, Jackie A.M. Dekens, Gerben Hermes, Agnieszka Baranska, Zlatan Mujagic, Morris A. Swertz, Angélica M. Muñoz, Patrick Deelen, Maria C. Cénit, Lude Franke, Salome Scholtens, Ronald P. Stolk, Cisca Wijmenga, Edith J.M. Feskens

---

Table S2. Crude and adjusted quality of life scores, two component scores and eight group scores in the LifeLines DEEP population (n=1,539) compared to a national sample of the Dutch population [34,39]

| Quality of life          |          | Crude      | Adjusted <sup>1</sup> | National (n=1,742) |
|--------------------------|----------|------------|-----------------------|--------------------|
| Physical Component Score | mean(sd) | 53.6(7.0)  | 53.7(7.0)             | 49.7(9.3)[34]      |
| Mental Component Score   | mean(sd) | 50.4(7.9)  | 50.5(7.8)             | 52.1(9.6)[34]      |
| Physical Functioning     | mean(sd) | 92.1(12.3) | 92.2(12.1)            | 83.0(22.8)[39]     |
| Role-Physical            | mean(sd) | 88.5(27.6) | 88.6(27.5)            | 76.4(36.3)[39]     |
| Bodily Pain              | mean(sd) | 85.1(18.2) | 85.2(18.1)            | 74.9(23.4)[39]     |
| General Health           | mean(sd) | 72.8(16.8) | 72.9(16.3)            | 70.7(20.7)[39]     |
| Vitality                 | mean(sd) | 67.2(15.5) | 67.4(15.1)            | 68.6(19.3)[39]     |
| Social Functioning       | mean(sd) | 88.3(16.6) | 88.4(16.4)            | 84.0(22.4)[39]     |
| Role-Emotional           | mean(sd) | 90.9(24.7) | 91.3(24.1)            | 82.3(32.9)[39]     |
| Mental Health            | mean(sd) | 79.3(12.6) | 79.4(12.4)            | 76.8(17.4)[39]     |

<sup>1</sup> adjusted for gender and age

34. Ware JE, Gandek B, Kosinski M, et al. The Equivalence of SF-36 Summary Health Scores Estimated Using Standard and Country-Specific Algorithms in 10 Countries. *J Clin Epidemiol* 1998;51:1167–70. doi:10.1016/S0895-4356(98)00108-5

39. Aaronson NK, Muller M, Cohen PD, et al. Translation, validation, and norming of the Dutch language version of the SF-36 Health Survey in community and chronic disease populations. *J Clin Epidemiol* 1998;51:1055–68.
